# Supplementary material
Source: PubMed Central journal article supplement (PMC3281659)

**Supplementary material for:**

**HYPERCHOLESTEROLEMIA INDUCES UPREGULATION OF  $K_{ACh}$  CARDIAC  
CURRENTS *VIA* A MECHANISM INDEPENDENT OF  $PIP_2$  AND  $G\beta\gamma$ .**

**Wu Deng<sup>2</sup>, Anna N. Bukiya<sup>3</sup>, Aldo A. Rodríguez-Menchaca<sup>2</sup>, Zhe Zhang<sup>2</sup>, Clive M.  
Baumgarten<sup>2</sup>, Diomedes E. Logothetis<sup>2</sup>, Irena Levitan<sup>1</sup> and Avia Rosenhouse-Dantsker<sup>1</sup>**

<sup>1</sup>From Department of Medicine, Pulmonary Section, University of Illinois at Chicago, Chicago, IL 60612, <sup>2</sup>Department of Physiology and Biophysics, Virginia Commonwealth University School of Medicine, Richmond, VA 23298, <sup>3</sup>Department of Pharmacology, The University of Tennessee Health Science Center, Memphis, TN 38163.

## Figure Captions for Supplementary Figures

**Supplementary Figure S1.** (A) Normalized current run-down of Kir3.4\* at  $-80\text{mV}$  in excised inside-out macropatches from control and cholesterol-enriched *Xenopus* oocytes ( $n=5-7$ ). (B) Whole-cell basal currents recorded in oocytes at  $-80\text{mV}$  showing the effect of cholesterol enrichment on Kir3.4\* in oocytes coexpressing Kir3.4\* and Ci-VSP. The currents are normalized relative to untreated oocytes expressing Kir3.4\* ( $n=6$  each).

**Supplementary Figure S2.** (A) Whole-cell currents recorded in oocytes at  $-80\text{ mV}$  for Kir3.4\*, for Kir3.4\* coexpressed with  $G\beta_1\gamma_2$  and for cholesterol enriched oocytes expressing Kir3.4\*. All currents are normalized relative to Kir3.4\* ( $n=15-34$ ). (B) Whole-cell currents recorded in oocytes at  $-80\text{ mV}$  for Kir3.1/Kir3.4, for Kir3.1/Kir3.4 coexpressed with  $G\beta_1\gamma_2$  and for cholesterol enriched oocytes expressing Kir3.1/Kir3.4. All currents are normalized relative to Kir3.1/Kir3.4 ( $n=11-12$ ). (C) Whole-cell currents recorded in oocytes at  $-80\text{ mV}$  for Kir3.4\*, for Kir3.4\* coexpressed with  $\beta\text{ARK-PH}$  and for cholesterol enriched oocytes expressing Kir3.4\*. All currents are normalized relative to Kir3.4\* ( $n=12-20$ ). (D) Whole-cell currents recorded in oocytes at  $-80\text{ mV}$  for Kir3.1/Kir3.4, for Kir3.1/Kir3.4 coexpressed with  $\beta\text{ARK-PH}$  and for cholesterol enriched oocytes expressing Kir3.1/Kir3.4. All currents are normalized relative to Kir3.1/Kir3.4 ( $n=10-12$ ). (E) Whole-cell currents recorded at  $-80\text{mV}$  for control and cholesterol-enriched oocytes expressing Kir3.4\* and Kir3.4\*E339Q. The currents are normalized to Kir3.4\* basal currents ( $n=10-12$ ).

# Supplementary Figure S1

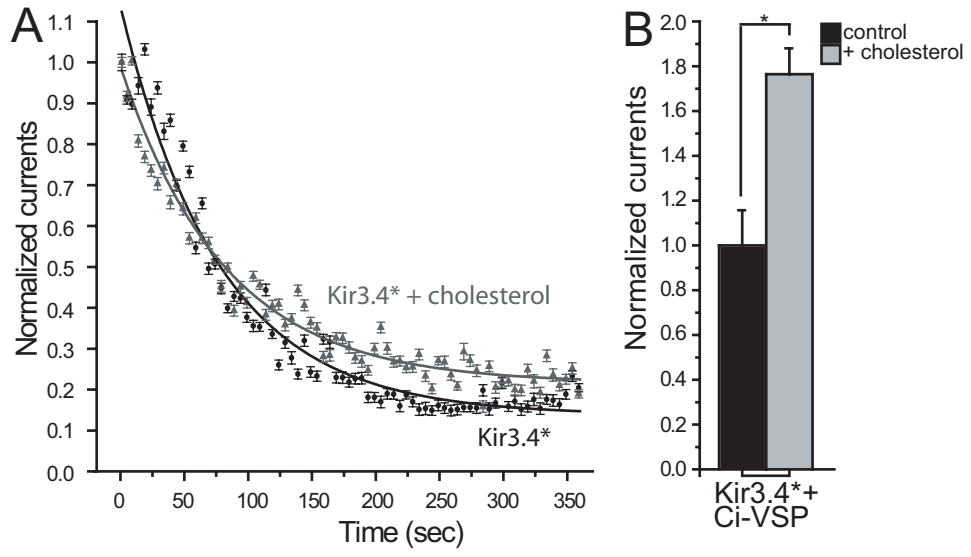

# Supplementary Figure S2

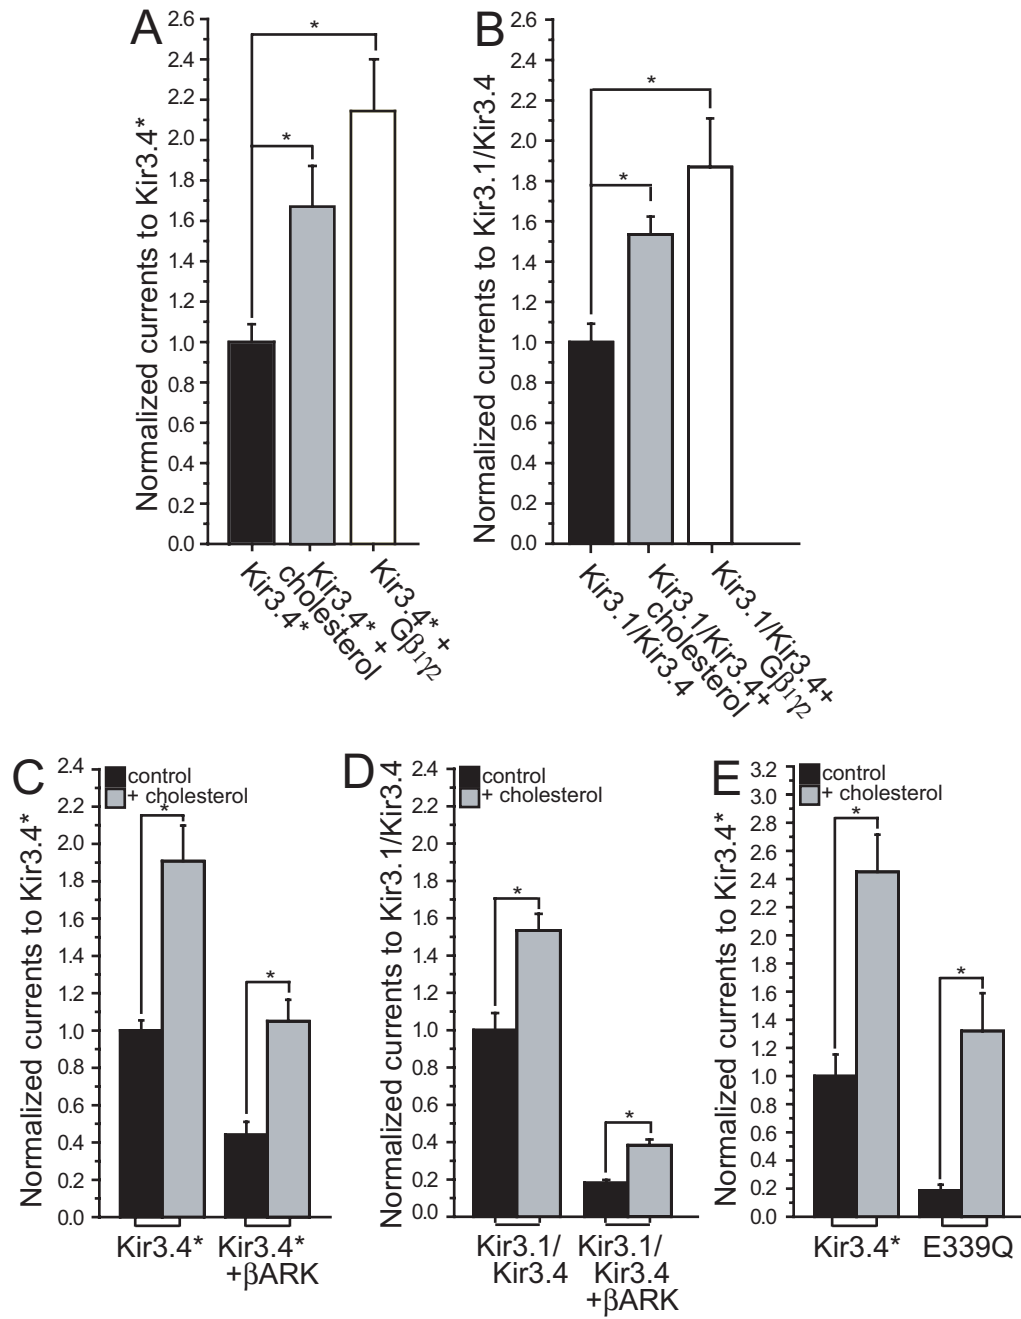

Supplement: supp_M111.306134_jbc.M111.306134-1.pdf [file supp_M111.306134_jbc.M111.306134-1.pdf]
